# Supplementary material
Source: Springer Nature journal article supplement (https://www.springermedizin.de/resource/supplementary/12985_2008_533_MOESM4_ESM.pdf/9608306)

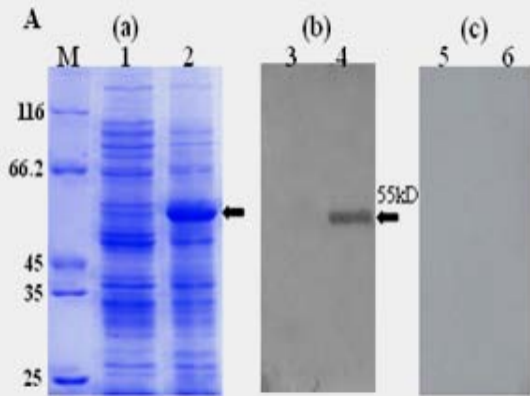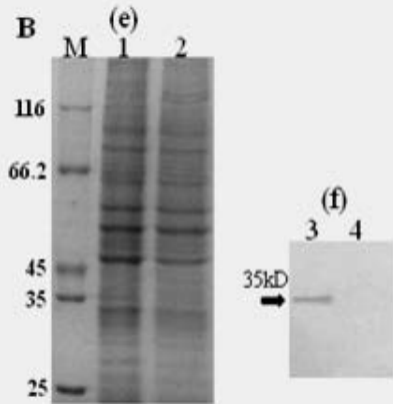

Supplement: MOESM4 [file 9608306]
